# Supplementary material for: Dispersal and Repulsion of Entomopathogenic Nematodes to Prenol
Source: MDPI journal article supplement (doi:10.3390/biology8030058), 2019-08-02
Supplement: s1 [file s1]

Supplementary Figure legends

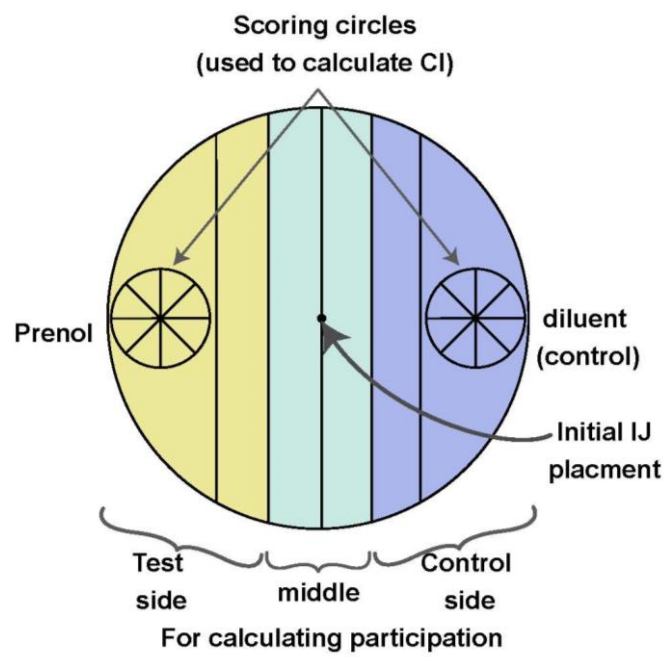

Figure S1. Scoring template for chemotaxis assays.

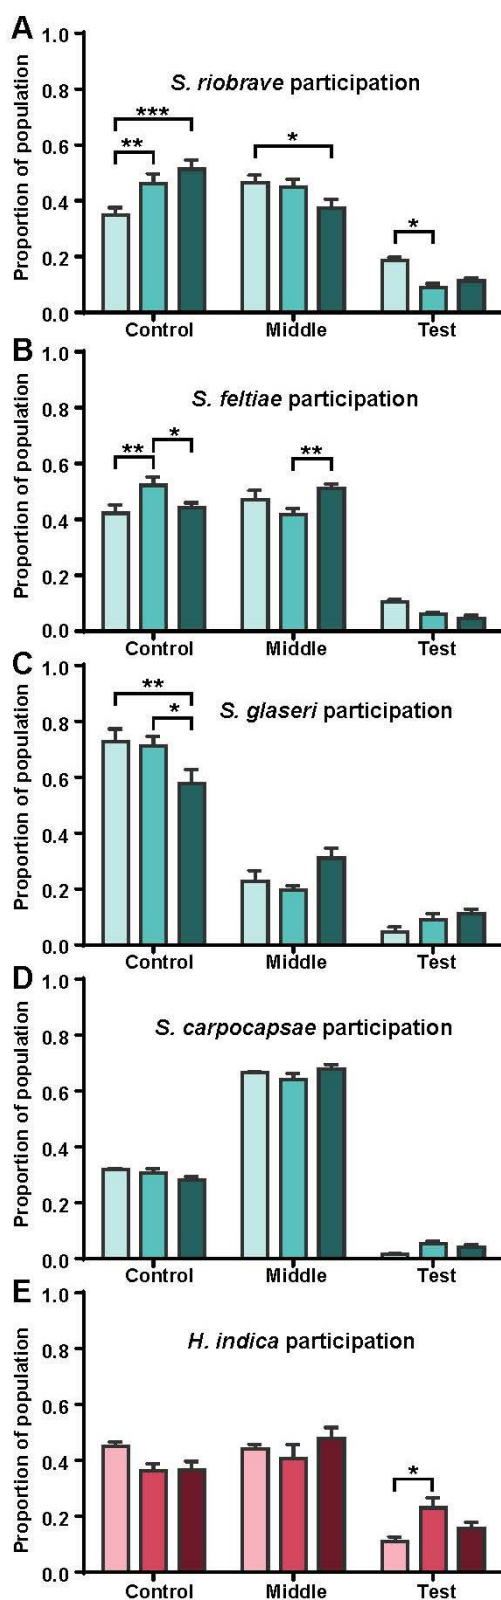

**Figure S2.** Participation scores from chemotaxis assays in Figure 1. Participation reflects that *S. riobrave*, *S. feltiae* and *S. glaseri* and *H. indica* responded with high participation (above 50% of the population moving from the center region) while *S. carpocapsae* had very low participation (less than 50% moving out of the center region).

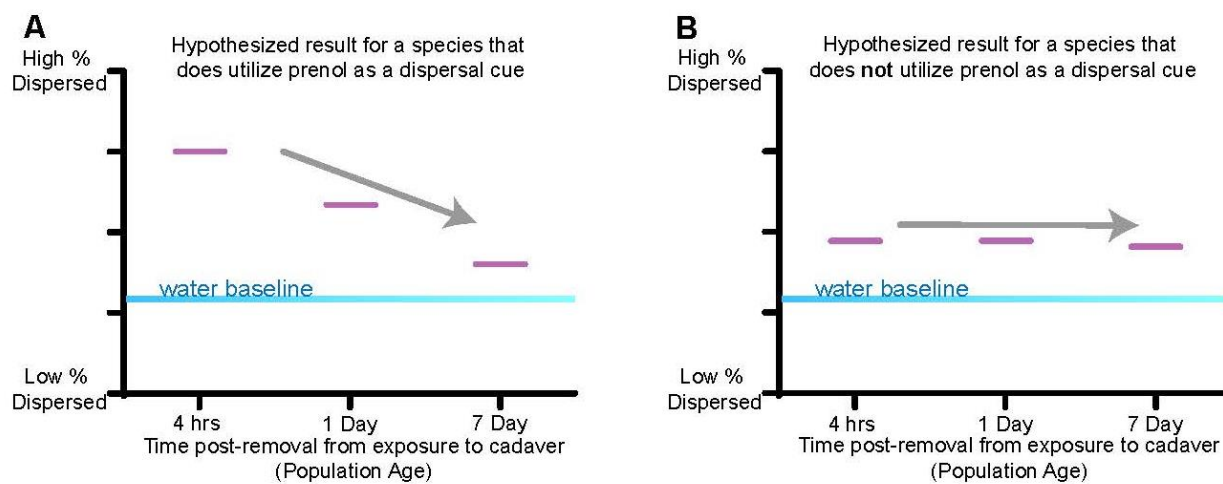

**Figure S3.** Graphical representation of our hypothesis or predicted behavioral trends for **A.** IJs that do respond to prenol as a dispersal cue **B.** IJs that do not respond to prenol as a dispersal cue.
